# Supplementary material
Source: PubMed Central journal article supplement (PMC4817886)
Supplement: mt201560x1.pdf [file mt201560x1.pdf]

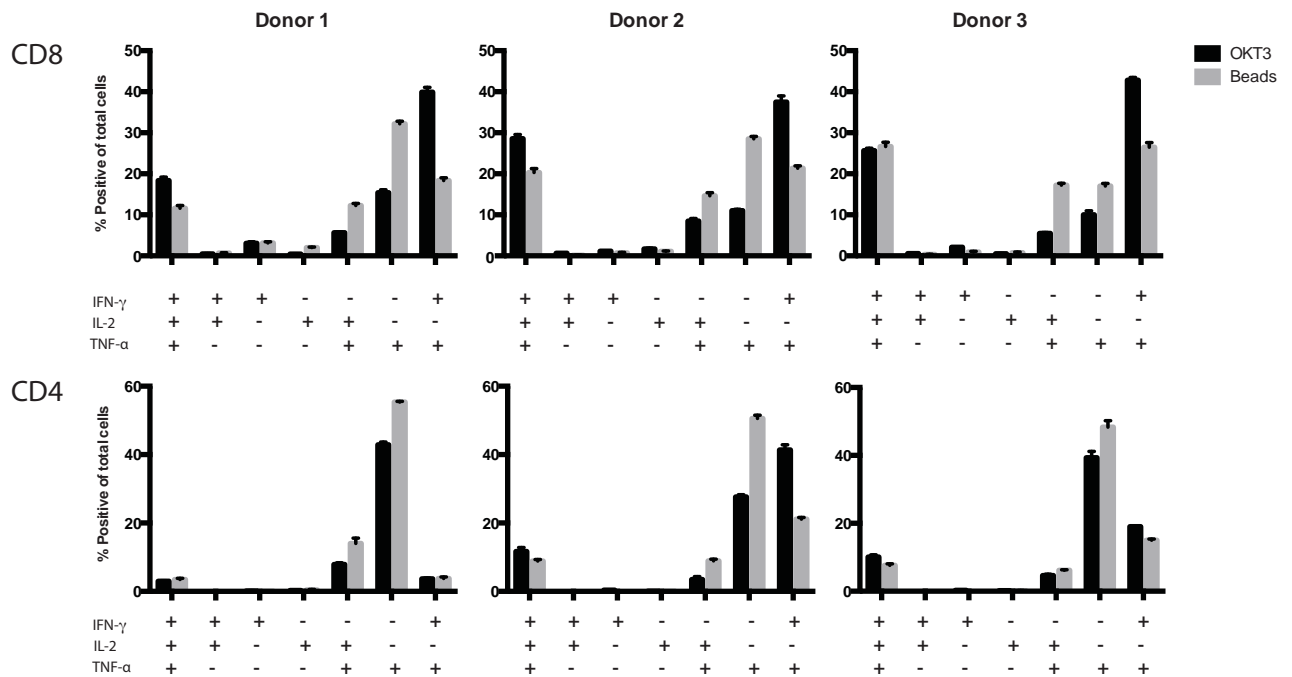

**Supplementary Figure 1. Intracellular cytokine production of TCR 1D3HMcys-transduced T-cells using two different activation/stimulation protocols.** Three different healthy donor derived PBMC's were stimulated and subsequently transduced with the 1D3HMcys TCR and cultured for 11 days with either OKT3 (50 ng/ml) and IL-2 (200 IU/ml) or with anti-CD3/CD28 beads and IL-7/IL-15 (5 ng/ml each). TCR-transduced cells were incubated with HLA-A2<sup>+</sup> MART-1<sup>+</sup> (mel624) or HLA-A2<sup>-</sup> MART-1<sup>+</sup> (mel938) melanoma cell lines or with PMA (50 ng/ml) and Ionomycin (1ug/ml) as positive control. Intracellular cytokine production for IFN- $\gamma$ , IL-2 and TNF- $\alpha$  was determined, by flow cytometry, for the TCR<sup>+</sup> cells after an overnight incubation. For three different donors, boolean gating is shown for transduced CD8<sup>+</sup> cells (top row) and transduced CD4<sup>+</sup> cells (bottom row) after co-culture with mel624. Bars show average of triplicates with SD (bars).

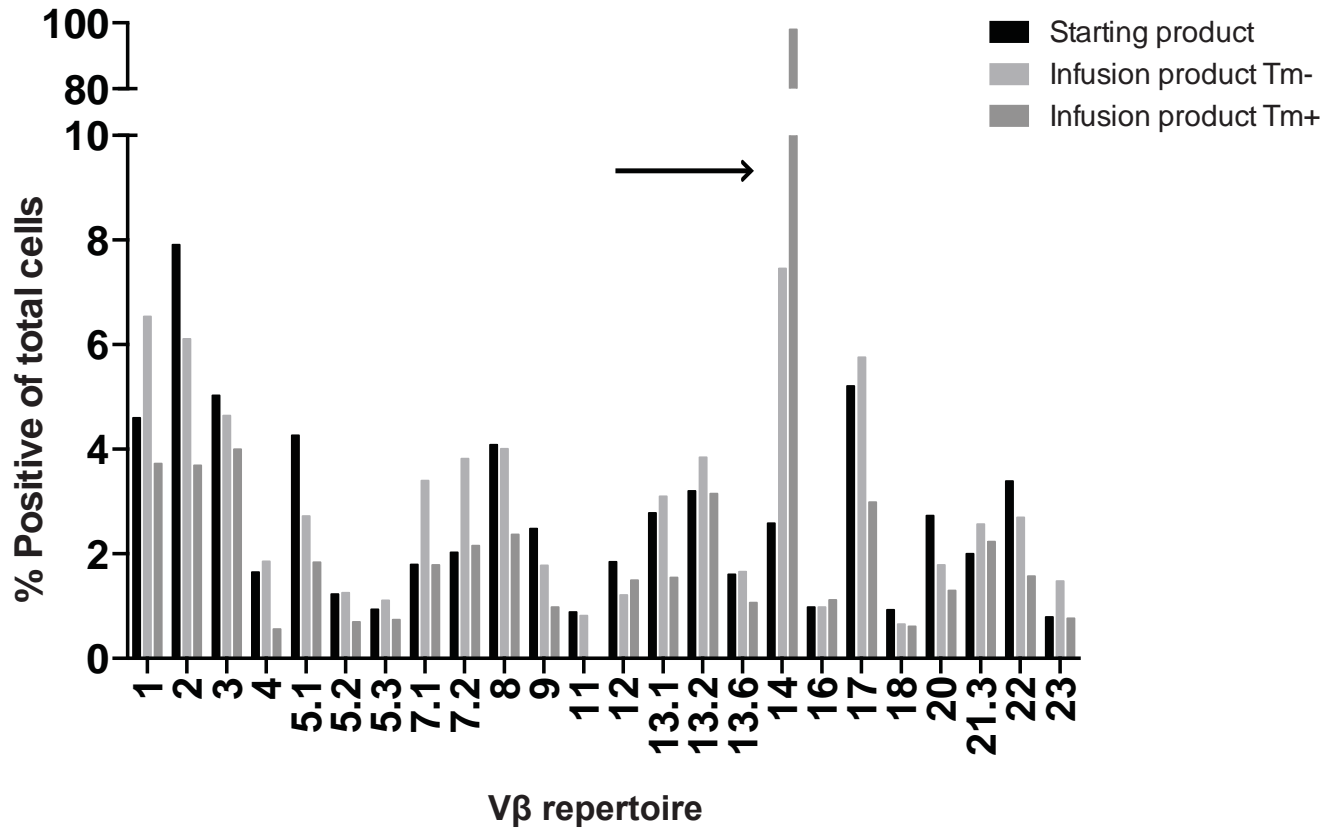

**Supplementary Figure 2. Transduced T cells have a wide TCR repertoire and are polyclonal.** Starting material (before transduction) and the infusion product from the patient was stained for the TCR Vβ repertoire using an IOtest® Beta Mark kit according manufacturer's protocol (Beckman Coulter). Arrow indicates the Vβ14 of the introduced TCR. Note: the % in the Tm+ cells might be an underestimation due to downregulation of the endogenous TCR.

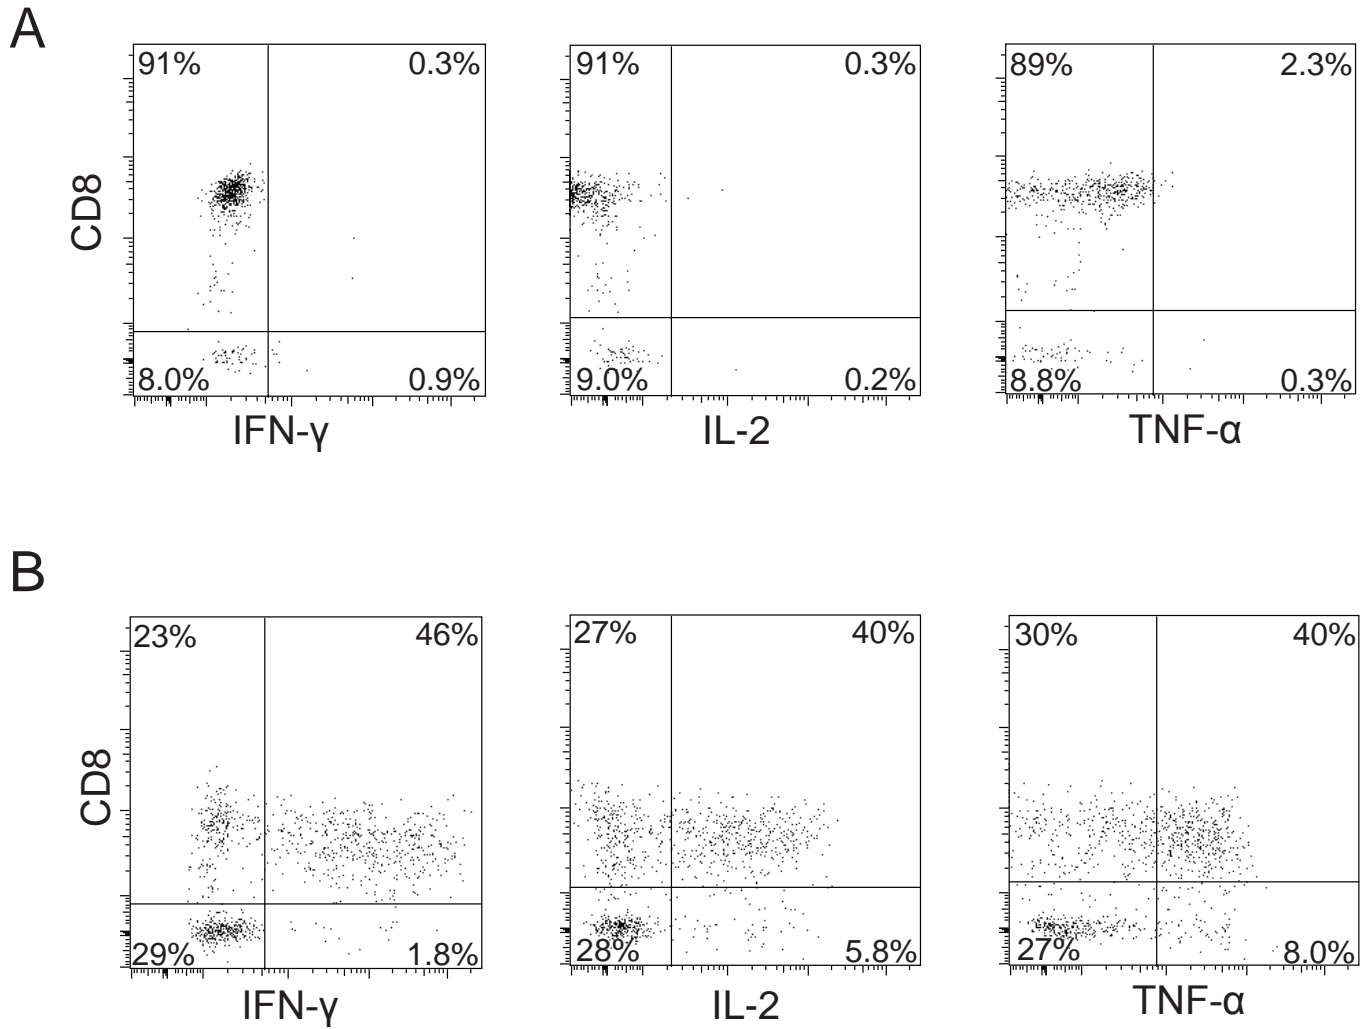

**Supplementary Figure 3. Cytokine production of patient derived TCR modified T cells.**

$2 \times 10^6$  patient derived PBMC's (in which 9% of lymphocytes are 1D3HMcys positive), collected 7 days post infusion, were cultured alone (**A**) or in the presence of  $2 \times 10^5$  HLA-A2<sup>+</sup> MART-1<sup>+</sup> (mel624) melanoma cells (**B**). Intracellular cytokine production for IFN- $\gamma$ , IL-2 and TNF- $\alpha$  was determined, by flow cytometry after an overnight incubation. Plots are gated on CD3<sup>+</sup> TCR<sup>+</sup> cells.
